# Supplementary material for: Extracting information on the spatial variability in erosion rate stored in detrital cooling age distributions in river sands
Source: Copernicus journal article supplement (doi:10.5194/esurf-6-257-2018), 2018-03-29
Supplement: Supplementary file 1 [file TableS1.pdf › Code and Data/TableS1.pdf]

**Table S1:** Ages used in our examples to build the distributions of ages shown in Figure 8.

Site names refer to locations shown in Figure 6.

| Site   | Age<br>(Myr) | Error<br>(Myr) | Site   | Age<br>(Myr) | Error<br>(Myr) | Site | Age<br>(Myr) | Error<br>(Myr) | Age<br>(Myr) | Error<br>(Myr) |
|--------|--------------|----------------|--------|--------------|----------------|------|--------------|----------------|--------------|----------------|
| TG-40a | 5.8          | 0.74           | TG-41a | 5.7          | 0.14           | A    | 0.31         | 0.15           | 8.58         | 0.09           |
|        | 7.36         | 1.17           |        | 7.14         | 0.21           |      | 0.35         | 0.12           | 8.61         | 0.1            |
|        | 10.17        | 2.75           |        | 7.21         | 0.19           |      | 0.39         | 0.18           | 8.66         | 0.04           |
|        | 11.29        | 0.77           |        | 8.62         | 0.46           |      | 0.56         | 0.06           | 8.84         | 0.09           |
|        | 11.37        | 0.11           |        | 8.81         | 0.14           |      | 0.57         | 0.68           | 9.18         | 0.05           |
|        | 11.46        | 0.84           |        | 9.13         | 0.15           |      | 0.62         | 0.19           | 9.22         | 0.04           |
|        | 12.24        | 0.88           |        | 9.14         | 0.24           |      | 0.68         | 0.03           | 9.54         | 0.11           |
|        | 12.43        | 6.65           |        | 9.21         | 0.37           |      | 0.94         | 0.03           | 9.58         | 0.15           |
|        | 12.45        | 1.12           |        | 9.24         | 0.18           |      | 1.11         | 0.08           | 9.66         | 0.05           |
|        | 12.5         | 1.93           |        | 9.55         | 0.13           |      | 1.64         | 0.02           | 9.72         | 0.07           |
|        | 12.53        | 0.28           |        | 9.79         | 0.27           |      | 2.25         | 0.16           | 9.81         | 0.03           |
|        | 12.55        | 0.47           |        | 10.45        | 0.22           |      | 2.41         | 0.03           | 10.02        | 0.07           |
|        | 12.72        | 0.52           |        | 10.72        | 0.24           |      | 2.93         | 0.04           | 10.38        | 0.07           |
|        | 12.73        | 0.71           |        | 10.86        | 0.17           |      | 3.97         | 0.09           | 10.49        | 0.05           |
|        | 12.78        | 0.55           |        | 10.98        | 0.19           |      | 4.24         | 0.03           | 10.59        | 0.16           |
|        | 12.9         | 1.73           |        | 11           | 0.14           |      | 4.57         | 0.04           | 10.75        | 0.07           |
|        | 13.02        | 0.91           |        | 11.1         | 0.16           |      | 5.14         | 0.11           | 10.8         | 0.1            |
|        | 13.39        | 0.91           |        | 11.91        | 0.46           |      | 5.44         | 0.03           | 10.84        | 0.07           |
|        | 13.46        | 2.26           |        | 12.03        | 0.2            |      | 5.54         | 0.07           | 10.95        | 0.14           |
|        | 13.56        | 0.69           |        | 12.29        | 0.29           |      | 5.84         | 0.21           | 10.96        | 0.07           |
|        | 13.97        | 0.84           |        | 12.54        | 0.19           |      | 5.9          | 0.31           | 11.57        | 0.17           |
|        | 14.47        | 1.6            |        | 12.99        | 0.21           |      | 6.25         | 0.1            | 11.57        | 0.08           |
|        | 14.95        | 0.33           |        | 13.23        | 0.19           |      | 6.56         | 0.1            | 11.68        | 0.03           |
|        | 15.19        | 0.7            |        | 14.31        | 0.2            |      | 6.59         | 0.08           | 12.02        | 0.14           |
|        | 15.59        | 1.3            |        | 14.47        | 0.27           |      | 6.63         | 0.04           | 12.18        | 0.07           |
|        | 15.62        | 0.47           |        | 15.11        | 0.17           |      | 6.76         | 0.11           | 12.27        | 0.08           |
|        | 15.72        | 1.22           |        | 15.43        | 0.26           |      | 6.86         | 0.09           | 12.55        | 0.07           |
|        | 17.15        | 0.56           |        | 15.86        | 0.41           |      | 7.34         | 0.1            | 13.34        | 0.08           |
|        | 17.7         | 0.42           |        | 15.87        | 0.24           |      | 7.54         | 0.2            | 13.88        | 0.07           |
|        | 17.79        | 0.37           |        | 16.26        | 0.29           |      | 7.55         | 0.54           | 14.65        | 0.11           |
|        | 26.43        | 0.95           |        | 16.34        | 0.13           |      | 7.63         | 0.04           | 14.7         | 0.05           |
|        | 46.67        | 0.95           |        | 20.2         | 0.19           |      | 7.86         | 0.04           | 14.93        | 0.05           |
|        | 111.71       | 1.42           |        | 94.72        | 0.63           |      | 7.89         | 0.14           | 15.05        | 0.08           |
|        | 198.13       | 1.3            |        | 130.59       | 0.9            |      | 7.96         | 0.14           | 15.27        | 0.07           |
|        |              |                |        | 147.93       | 0.94           |      | 8.02         | 0.05           | 15.32        | 0.08           |
|        |              |                |        | 168.89       | 1.07           |      | 8.08         | 0.18           | 15.43        | 0.16           |
|        |              |                |        | 175.62       | 1.06           |      | 8.09         | 0.06           | 15.72        | 0.09           |
|        |              |                |        | 177.19       | 1.1            |      | 8.18         | 0.07           | 16.14        | 0.09           |
|        |              |                |        | 183.5        | 1.26           |      | 8.51         | 0.05           | 16.45        | 0.05           |

**Table S1:** Continued.

| Site    | Age<br>(Myr) | Error<br>(Myr) | Age<br>(Myr) | Error<br>(Myr) | Site | Age<br>(Myr) | Error<br>(Myr) | Age<br>(Myr) | Error<br>(Myr) |
|---------|--------------|----------------|--------------|----------------|------|--------------|----------------|--------------|----------------|
| A       | 17.01        | 0.07           | 27.29        | 0.11           | Y    | 15.29        | 0.46           | 42.96        | 0.17           |
| (cont.) | 17.49        | 0.06           | 42.09        | 0.47           |      | 26.87        | 0.1            | 43.32        | 0.16           |
|         | 17.61        | 0.12           | 43.21        | 0.64           |      | 27.02        | 0.09           | 44.18        | 0.17           |
|         | 17.81        | 0.27           | 44.26        | 0.21           |      | 27.16        | 0.08           | 45.3         | 0.14           |
|         | 17.85        | 0.11           | 66.89        | 0.26           |      | 27.87        | 0.09           | 45.78        | 0.11           |
|         | 17.88        | 0.1            | 72.85        | 0.51           |      | 27.97        | 0.12           | 47.38        | 0.16           |
|         | 18.18        | 0.15           | 109.86       | 0.61           |      | 28.03        | 0.1            | 48.07        | 0.14           |
|         | 18.69        | 0.1            | 118.4        | 0.49           |      | 28.05        | 0.12           | 48.66        | 0.16           |
|         | 19.06        | 0.18           | 120.25       | 0.83           |      | 28.1         | 0.17           | 261.04       | 1.13           |
|         | 19.5         | 0.08           | 136.52       | 0.58           |      | 28.14        | 0.17           | 1548.29      | 26.81          |
|         | 19.66        | 0.05           |              |                |      | 28.39        | 0.12           |              |                |
|         | 19.87        | 0.13           |              |                |      | 28.45        | 0.15           |              |                |
|         | 19.99        | 0.1            |              |                |      | 28.58        | 0.12           |              |                |
|         | 20.24        | 0.17           |              |                |      | 28.77        | 0.09           |              |                |
|         | 20.33        | 0.09           |              |                |      | 28.85        | 0.13           |              |                |
|         | 20.33        | 0.09           |              |                |      | 28.87        | 0.08           |              |                |
|         | 20.4         | 0.19           |              |                |      | 28.87        | 0.11           |              |                |
|         | 20.98        | 0.11           |              |                |      | 28.96        | 0.09           |              |                |
|         | 21.29        | 0.05           |              |                |      | 29.07        | 0.11           |              |                |
|         | 21.54        | 0.11           |              |                |      | 29.44        | 0.12           |              |                |
|         | 22.06        | 0.07           |              |                |      | 29.97        | 0.1            |              |                |
|         | 22.2         | 0.09           |              |                |      | 30.05        | 0.1            |              |                |
|         | 22.55        | 0.07           |              |                |      | 30.15        | 0.14           |              |                |
|         | 22.61        | 0.11           |              |                |      | 31.22        | 0.1            |              |                |
|         | 23.01        | 0.17           |              |                |      | 31.34        | 0.13           |              |                |
|         | 23.29        | 0.07           |              |                |      | 31.54        | 0.09           |              |                |
|         | 23.32        | 0.09           |              |                |      | 32.47        | 0.17           |              |                |
|         | 23.55        | 0.24           |              |                |      | 32.54        | 0.19           |              |                |
|         | 23.84        | 0.26           |              |                |      | 32.65        | 0.32           |              |                |
|         | 24.07        | 0.18           |              |                |      | 32.8         | 0.12           |              |                |
|         | 24.16        | 0.07           |              |                |      | 35.86        | 0.15           |              |                |
|         | 24.36        | 0.11           |              |                |      | 37.53        | 0.1            |              |                |
|         | 24.87        | 0.14           |              |                |      | 40.03        | 0.09           |              |                |
|         | 24.95        | 0.35           |              |                |      | 40.19        | 0.11           |              |                |
|         | 25.08        | 0.15           |              |                |      | 40.59        | 0.11           |              |                |
|         | 25.44        | 0.14           |              |                |      | 41.58        | 0.19           |              |                |
|         | 26.01        | 0.21           |              |                |      | 41.86        | 0.15           |              |                |
|         | 27.08        | 6.51           |              |                |      | 42.74        | 0.42           |              |                |
|         | 27.19        | 0.11           |              |                |      | 42.77        | 0.34           |              |                |

**Table S1:** Continued.

| Site | Age<br>(Myr) | Error<br>(Myr) | Age<br>(Myr) | Error<br>(Myr) | Site | Age<br>(Myr) | Error<br>(Myr) | Age<br>(Myr) | Error<br>(Myr) |
|------|--------------|----------------|--------------|----------------|------|--------------|----------------|--------------|----------------|
| B    | 0.41         | 0.04           | 21.76        | 0.06           | X    | 13.02        | 0.13           | 16.7         | 0.12           |
|      | 0.52         | 0.44           | 21.86        | 0.17           |      | 13.83        | 0.21           | 16.92        | 0.06           |
|      | 0.55         | 0.1            | 22.02        | 0.11           |      | 14.35        | 1.42           | 17.02        | 0.12           |
|      | 0.73         | 0.03           | 22.21        | 0.17           |      | 14.87        | 0.1            | 17.05        | 0.09           |
|      | 0.8          | 0.06           | 22.45        | 0.08           |      | 14.99        | 0.13           | 17.16        | 0.12           |
|      | 0.8          | 0.12           | 23.05        | 0.07           |      | 15.26        | 0.1            | 17.33        | 0.11           |
|      | 3.95         | 0.18           | 23.23        | 0.05           |      | 15.27        | 0.05           | 17.47        | 0.11           |
|      | 4.91         | 0.03           | 23.4         | 0.1            |      | 15.44        | 0.09           | 18.09        | 0.07           |
|      | 4.96         | 0.04           | 24.44        | 0.23           |      | 15.5         | 0.06           | 20.48        | 0.21           |
|      | 5.76         | 0.04           | 24.56        | 0.12           |      | 15.54        | 0.13           | 20.54        | 0.14           |
|      | 6.53         | 0.05           | 24.56        | 0.14           |      | 15.57        | 0.05           | 21.27        | 0.04           |
|      | 6.91         | 0.04           | 25.06        | 0.09           |      | 15.58        | 0.11           |              |                |
|      | 7.08         | 0.09           | 25.91        | 0.09           |      | 15.59        | 0.09           |              |                |
|      | 7.51         | 0.07           | 25.93        | 0.16           |      | 15.67        | 0.08           |              |                |
|      | 7.54         | 0.06           | 26.87        | 0.17           |      | 15.68        | 0.14           |              |                |
|      | 7.86         | 0.06           | 27.03        | 0.13           |      | 15.69        | 0.1            |              |                |
|      | 7.88         | 0.46           | 27.34        | 0.11           |      | 15.72        | 0.08           |              |                |
|      | 8.34         | 0.04           | 27.36        | 0.29           |      | 15.73        | 0.2            |              |                |
|      | 8.45         | 0.03           | 27.67        | 0.14           |      | 15.8         | 0.02           |              |                |
|      | 9.53         | 0.12           | 28.19        | 0.11           |      | 15.81        | 0.07           |              |                |
|      | 9.59         | 0.07           | 89.67        | 0.7            |      | 15.84        | 0.18           |              |                |
|      | 9.84         | 0.11           | 135.58       | 0.67           |      | 15.84        | 0.08           |              |                |
|      | 11.59        | 0.03           | 147.42       | 0.71           |      | 15.87        | 0.05           |              |                |
|      | 13.11        | 0.21           | 152.98       | 0.42           |      | 15.9         | 0.04           |              |                |
|      | 13.98        | 0.1            | 170.29       | 0.34           |      | 15.9         | 0.05           |              |                |
|      | 15.94        | 0.12           | 229.36       | 1.09           |      | 15.93        | 0.1            |              |                |
|      | 16.4         | 0.08           |              |                |      | 15.95        | 0.12           |              |                |
|      | 16.41        | 0.04           |              |                |      | 16.01        | 0.28           |              |                |
|      | 16.44        | 0.08           |              |                |      | 16.03        | 0.12           |              |                |
|      | 16.83        | 0.12           |              |                |      | 16.05        | 0.08           |              |                |
|      | 17.28        | 0.06           |              |                |      | 16.09        | 0.06           |              |                |
|      | 17.6         | 0.23           |              |                |      | 16.12        | 0.12           |              |                |
|      | 17.84        | 0.61           |              |                |      | 16.13        | 0.04           |              |                |
|      | 18.56        | 0.2            |              |                |      | 16.16        | 0.45           |              |                |
|      | 18.77        | 0.06           |              |                |      | 16.26        | 0.05           |              |                |
|      | 18.82        | 0.45           |              |                |      | 16.3         | 0.12           |              |                |
|      | 19.75        | 0.15           |              |                |      | 16.3         | 0.05           |              |                |
|      | 21.47        | 0.08           |              |                |      | 16.35        | 0.1            |              |                |
|      | 21.69        | 0.08           |              |                |      | 16.45        | 0.06           |              |                |

**Table S1:**Continued.

| Site | Age<br>(Myr) | Error<br>(Myr) | Age<br>(Myr) | Error<br>(Myr) | Site | Age<br>(Myr) | Error<br>(Myr) |
|------|--------------|----------------|--------------|----------------|------|--------------|----------------|
| C    | 0.31         | 0.03           | 13.15        | 0.09           | Z    | 5.09         | 2.95           |
|      | 0.31         | 0.04           | 13.31        | 0.14           |      | 7.21         | 0.17           |
|      | 0.32         | 0.11           | 14.09        | 0.08           |      | 9.02         | 0.22           |
|      | 0.34         | 0.05           | 15.34        | 0.06           |      | 9.3          | 0.88           |
|      | 0.37         | 0.04           | 15.34        | 0.16           |      | 9.36         | 0.11           |
|      | 0.38         | 0.03           | 15.38        | 0.09           |      | 9.4          | 1.1            |
|      | 0.41         | 0.06           | 15.89        | 0.2            |      | 10           | 0.42           |
|      | 0.5          | 0.06           | 16.03        | 0.06           |      | 10.05        | 0.35           |
|      | 0.5          | 0.06           | 16.55        | 0.5            |      | 10.33        | 1.07           |
|      | 1.01         | 0.06           | 17.33        | 0.14           |      | 10.68        | 0.1            |
|      | 1.34         | 0.12           | 17.34        | 0.21           |      | 10.87        | 0.25           |
|      | 1.43         | 0.07           | 17.39        | 0.43           |      | 10.91        | 0.7            |
|      | 4.68         | 0.08           | 17.45        | 0.18           |      | 11.53        | 1.04           |
|      | 5.24         | 0.13           | 17.47        | 0.12           |      | 11.61        | 0.12           |
|      | 5.82         | 0.04           | 17.89        | 0.07           |      | 12.27        | 0.93           |
|      | 6.11         | 0.12           | 17.96        | 0.2            |      | 12.56        | 0.16           |
|      | 6.2          | 0.04           | 18.56        | 0.15           |      | 12.74        | 0.11           |
|      | 6.84         | 0.05           | 19.35        | 0.1            |      | 14.06        | 0.33           |
|      | 7.1          | 0.12           | 19.84        | 0.08           |      | 14.15        | 0.35           |
|      | 7.7          | 0.06           | 20.14        | 0.09           |      | 14.67        | 0.39           |
|      | 7.73         | 0.07           | 20.66        | 0.11           |      | 14.78        | 0.38           |
|      | 8.35         | 0.05           | 21.91        | 0.09           |      | 15.8         | 0.71           |
|      | 8.36         | 0.06           | 24.54        | 0.41           |      | 17.76        | 0.33           |
|      | 8.6          | 0.06           | 25.34        | 0.11           |      | 17.87        | 0.37           |
|      | 8.74         | 0.1            | 25.73        | 0.11           |      | 18.09        | 0.11           |
|      | 9.16         | 0.06           | 26.12        | 0.14           |      | 18.27        | 0.29           |
|      | 9.28         | 0.04           | 26.55        | 0.13           |      | 18.44        | 0.23           |
|      | 9.35         | 0.14           | 26.58        | 0.31           |      | 18.99        | 0.36           |
|      | 9.43         | 0.07           | 27.13        | 0.09           |      | 19.08        | 0.13           |
|      | 9.57         | 0.06           | 27.34        | 0.14           |      | 20.56        | 0.39           |
|      | 9.79         | 0.05           | 28.01        | 0.28           |      | 20.87        | 0.21           |
|      | 9.85         | 0.11           | 63.32        | 0.31           |      | 21.28        | 0.16           |
|      | 10.16        | 0.15           | 69.47        | 0.22           |      | 21.8         | 0.22           |
|      | 10.82        | 0.09           | 123.24       | 0.51           |      | 22.34        | 0.34           |
|      | 11.17        | 0.07           | 129.38       | 0.59           |      | 23.67        | 1.67           |
|      | 11.89        | 0.08           | 192.19       | 0.51           |      | 96.7         | 0.4            |
|      | 12.07        | 0.05           |              |                |      | 965.12       | 2.58           |
|      | 12.35        | 0.08           |              |                |      | 1172.56      | 2.59           |
|      | 13.13        | 0.06           |              |                |      | 1494.61      | 4.25           |
