# Supplementary material for: Extracting information on the spatial variability in erosion rate stored in detrital cooling age distributions in river sands
Source: Copernicus journal article supplement (doi:10.5194/esurf-6-257-2018), 2018-03-29
Supplement: Supplementary file [file esurf-6-257-2018-supplement-title-page.pdf › esurf-6-257-2018-supplement-title-page.pdf]

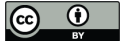

## *Supplement of*

# **Extracting information on the spatial variability in erosion rate stored in detrital cooling age distributions in river sands**

**Jean Braun et al.**

*Correspondence to:* Jean Braun ([jb Braun@gfz-potsdam.de](mailto:jb Braun@gfz-potsdam.de))

- [esurf-6-257-2018-supplement-title-page.pdf](#)
- Code and Data
  - .DS\_Store
  - A.txt
  - B.txt
  - BinRange.txt
  - Bins2E.ipynb
  - Bins2E.py
  - C.txt
  - StationNames.txt
  - SyntheticDistributionTest.ipynb
  - TG-40a.txt
  - TG-41a.txt
  - TableS1.pdf
  - X.txt
  - Y.txt
  - Z.txt

The copyright of individual parts of the supplement might differ from the CC BY 4.0 License.
